# Supplementary material for: A distorted octahedron-dependent red-emitting Li2K4TiOGe4O12:Mn4+ phosphor for white LEDs
Source: Royal Society of Chemistry journal article supplement (doi:10.1039/d3nj00786c), 2023-01-01
Supplement: d3nj00786c1.pdf [file d3nj00786c1.pdf]

## Supplementary information

### Distorted octahedron-dependent red-emitting $\text{Li}_2\text{K}_4\text{TiOGe}_4\text{O}_{12}:\text{Mn}^{4+}$ phosphor for White LEDs

Haiyan Wu,<sup>a,b,c,d</sup> Guang Zhu,<sup>\*b</sup> Jian Zhang,<sup>a,b</sup> Hui Xie,<sup>b</sup> Tao Tan,<sup>c,d</sup> Yan Gao,<sup>\*a</sup> Lihong Jiang,<sup>\*c</sup> Chengyu Li,<sup>c,d</sup> and Hongjie Zhang<sup>c</sup>

<sup>a</sup> Key Laboratory for Water Quality and Conservation of the Pearl River Delta, Institute of Environmental Research at Greater Bay Area, Guangzhou University, Ministry of Education, Guangzhou 510006, China

<sup>b</sup> Key Laboratory of Spin Electron and Nanomaterials of Anhui Higher Education Institutes, Suzhou University, Suzhou 234000, China

<sup>c</sup> State Key Laboratory of Rare Earth Resource Utilization, Changchun Institute of Applied Chemistry, Chinese Academy of Sciences, Changchun 130022, People's Republic of China

<sup>d</sup> University of Science and Technology of China, Hefei 230026, People's Republic of China

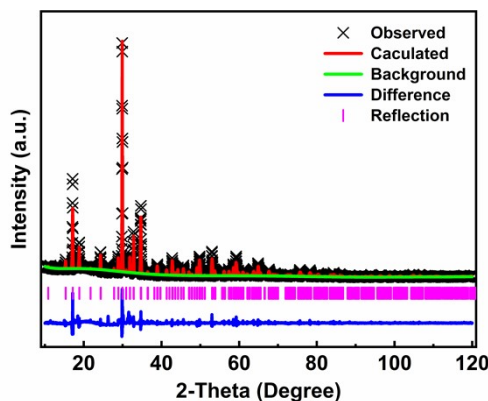

**Fig. S1** XRD Rietveld refinement patterns of LKTGO.

**Table S1.** Rietveld fitting results of LKTGO and LKTGO:0.003Mn<sup>4+</sup>.

| formula                         | LKTGO       | LKTGO:0.003Mn <sup>4+</sup> |
|---------------------------------|-------------|-----------------------------|
| crystal system                  | tetragonal  | tetragonal                  |
| space group                     | <i>P4nc</i> | <i>P4nc</i>                 |
| <i>a</i> (Å)                    | 11.5970(5)  | 11.62134(7)                 |
| <i>b</i> (Å)                    | 11.5970(5)  | 11.62134(7)                 |
| <i>c</i> (Å)                    | 5.1738(3)   | 5.184171(2)                 |
| $\alpha = \beta = \gamma$ (deg) | 90          | 90                          |
| <i>Z</i>                        | 2           | 2                           |
| <i>V</i> (Å <sup>3</sup> )      | 695.82(8)   | 696.83(3)                   |
| <i>R<sub>p</sub></i>            | 0.0878      | 0.0708                      |
| <i>R<sub>wp</sub></i>           | 0.0998      | 0.0582                      |
| $\chi^2$                        | 14.04       | 6.888                       |

**Table S2.** Atomic positions of LKTGO.

| atom | x      | y      | z       | occupancy | $U_{\text{iso}}$ |
|------|--------|--------|---------|-----------|------------------|
| Li   | 1      | 0.5    | 0.2729  | 1.000     | 0.0400           |
| K    | 0.7662 | 0.9217 | -0.0899 | 1.000     | 0.0160           |
| Ti   | 1      | 1      | 0.4464  | 1.000     | 0.0043           |
| Ge   | 0.7803 | 0.6084 | -0.0603 | 1.000     | 0.0177           |
| O1   | 0.8798 | 0.4827 | -0.0984 | 1.000     | 0.0165           |
| O2   | 0.6271 | 0.5904 | 0.0160  | 1.000     | 0.0837           |
| O3   | 0.7670 | 0.6740 | -0.3600 | 1.000     | 0.0583           |
| O4   | 1      | 1      | 0.1132  | 1.000     | 0.0278           |

**Table S3.** Atomic positions of LKTGO:0.003Mn<sup>4+</sup>.

| atom | x      | y      | z       | occupancy | $U_{\text{iso}}$ |
|------|--------|--------|---------|-----------|------------------|
| Li   | 0.0000 | 0.5000 | 0.2511  | 1.0000    | 0.07778          |
| K    | 0.7665 | 0.9225 | -0.0710 | 1.0000    | 0.01812          |
| Ti   | 1.0000 | 1.0000 | 0.3749  | 0.9948    | 0.00740          |
| Ge   | 0.7816 | 0.6087 | -0.0956 | 1.0000    | 0.01534          |
| O1   | 0.8908 | 0.4810 | -0.0500 | 1.0000    | 0.00681          |
| O2   | 0.6302 | 0.5917 | 0.0124  | 1.0000    | 0.13379          |
| O3   | 0.7542 | 0.6720 | -0.3825 | 1.0000    | 0.06131          |
| O4   | 1.0000 | 1.0000 | 0.7194  | 1.0000    | 0.00851          |
| Mn   | 1.0000 | 1.0000 | 0.3749  | 0.0052    | 0.00740          |

**Table S4.** The calculated  $\beta_1$  values and spectroscopic parameters of Mn<sup>4+</sup> ions in various hosts.

| Host                                                              | $D_q$ | $B$ | $C$  | $\beta_1$ | $E$ ( $^2E_g$ ) | Ref       |
|-------------------------------------------------------------------|-------|-----|------|-----------|-----------------|-----------|
| CaZrO <sub>3</sub>                                                | 1850  | 754 | 3173 | 0.983     | 15054           | 1         |
| Ba <sub>2</sub> GdNbO <sub>6</sub>                                | 1931  | 855 | 2859 | 0.992     | 14793           | 2         |
| CaAl <sub>12</sub> O <sub>19</sub>                                | 2132  | 807 | 3088 | 0.999     | 15244           | 3         |
| SrGe <sub>4</sub> O <sub>9</sub>                                  | 2362  | 832 | 3024 | 1.004     | 15267           | 4         |
| Ca <sub>2</sub> LaNbO <sub>6</sub>                                | 1934  | 838 | 2827 | 0.976     | 14598           | 5         |
| Sr <sub>2</sub> MgGe <sub>2</sub> O <sub>7</sub>                  | 2387  | 833 | 2989 | 0.975     | 15175           | 6         |
| La(MgTi) <sub>1/2</sub> O <sub>3</sub>                            | 2053  | 700 | 2959 | 0.915     | 14124           | 7         |
| Mg <sub>2</sub> Al <sub>4</sub> Si <sub>5</sub> O <sub>18</sub>   | 2141  | 927 | 2560 | 0.996     | 14705           | 8         |
| K <sub>2</sub> Ge <sub>4</sub> O <sub>9</sub>                     | 2163  | 785 | 3146 | 0.996     | 15281           | 9         |
| CaMg <sub>2</sub> La <sub>2</sub> W <sub>2</sub> O <sub>12</sub>  | 2088  | 731 | 2912 | 0.924     | 14124           | 10        |
| LiAl <sub>5</sub> O <sub>8</sub>                                  | 2014  | 725 | 2900 | 0.920     | 13977           | 11        |
| YAlO <sub>3</sub>                                                 | 2100  | 720 | 3025 | 0.938     | 14450           | 12        |
| Y <sub>2</sub> Sn <sub>2</sub> O <sub>7</sub>                     | 2100  | 700 | 3515 | 1.016     | 15563           | 13        |
| SrMgAl <sub>10</sub> O <sub>17</sub>                              | 2237  | 791 | 3084 | 0.989     | 15152           | 14        |
| YAl <sub>3</sub> (BO <sub>3</sub> ) <sub>4</sub>                  | 1890  | 755 | 3015 | 0.956     | 14620           | 15        |
| Li <sub>2</sub> K <sub>4</sub> TiOGe <sub>4</sub> O <sub>12</sub> | 2137  | 813 | 3007 | 0.990     | 15038           | This work |

**Table S5.** CIE coordinates of LKTGO:0.003Mn<sup>4+</sup> at different temperature ( $T = 298\text{--}473$  K).

| Temperature (K) | CIE coordinates ( $x, y$ ) |
|-----------------|----------------------------|
| 298             | (0.719, 0.281)             |
| 323             | (0.716, 0.283)             |
| 348             | (0.711, 0.288)             |
| 373             | (0.700, 0.298)             |
| 398             | (0.676, 0.320)             |
| 423             | (0.625, 0.366)             |
| 448             | (0.552, 0.433)             |
| 473             | (0.496, 0.484)             |

**Table S6.** The parameters of the prepared LED at various driving currents.

| Current (mA) | Luminous efficiency (lm/W) |
|--------------|----------------------------|
| 20           | 0.67                       |
| 40           | 0.65                       |
| 60           | 0.61                       |
| 80           | 0.61                       |
| 100          | 0.55                       |
| 120          | 0.52                       |
| 140          | 0.50                       |
| 160          | 0.47                       |
| 180          | 0.46                       |
| 200          | 0.44                       |
| 220          | 0.43                       |
| 240          | 0.42                       |
| 260          | 0.41                       |
| 280          | 0.40                       |
| 300          | 0.40                       |

**Table S7.** The parameters of the prepared WLED at various driving currents.

| Current (mA) | Luminous efficiency (lm/W) | CRI   |
|--------------|----------------------------|-------|
| 20           | 56.89                      | 90.20 |
| 30           | 56.20                      | 88.52 |
| 40           | 55.08                      | 87.60 |
| 50           | 54.06                      | 86.08 |
| 60           | 53.66                      | 84.80 |
| 70           | 52.88                      | 83.28 |
| 80           | 52.02                      | 81.30 |
| 90           | 51.66                      | 80.08 |
| 100          | 51.23                      | 78.60 |
| 110          | 50.12                      | 77.08 |
| 120          | 50.11                      | 75.56 |

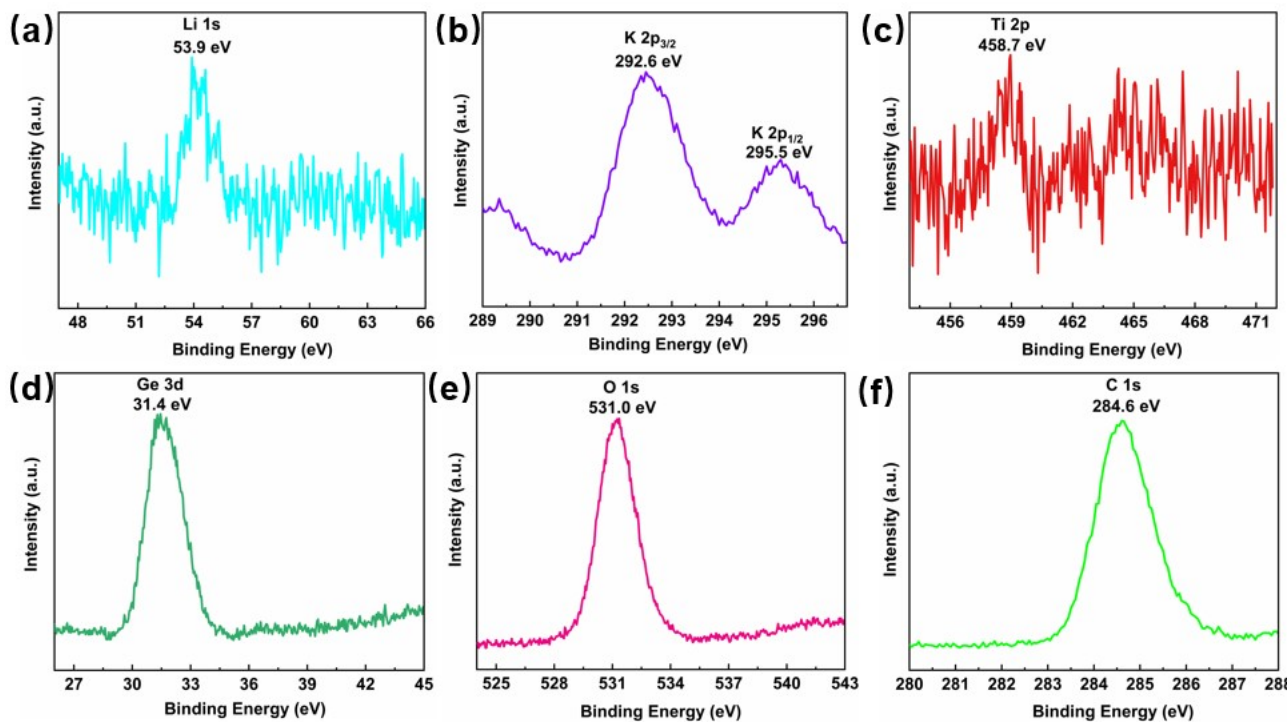

**Fig. S2** XPS spectrogram of the LKTGO:0.003Mn<sup>4+</sup> phosphors. (a) Li-1s, (b) K-2p, (c)Ti-2p, (d) Ge-3d, (e) O-1s and (f) C-1s.

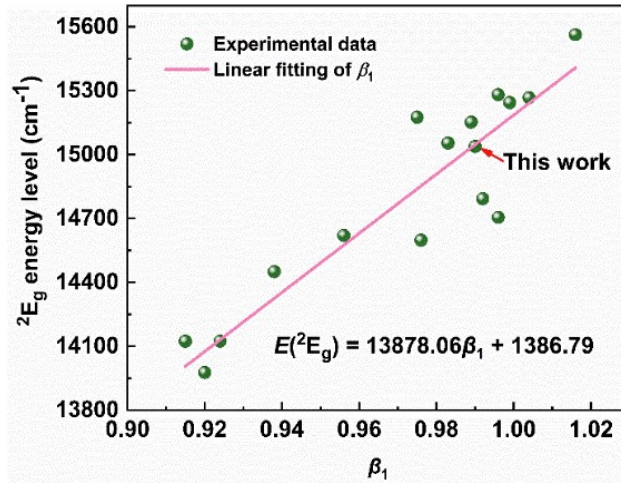

**Fig. S3** Empirical relation between the nephelauxetic ratio  $\beta_1$  and the energy position of the  $\text{Mn}^{4+}$ :  ${}^2E_g$  state in octahedral complexes.

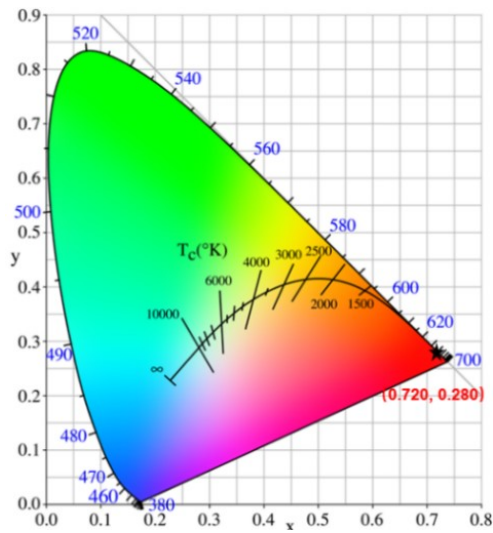

**Fig. S4** CIE coordinates of LKTGO:0.003 $\text{Mn}^{4+}$  phosphors at room temperature ( $T = 273$ ).

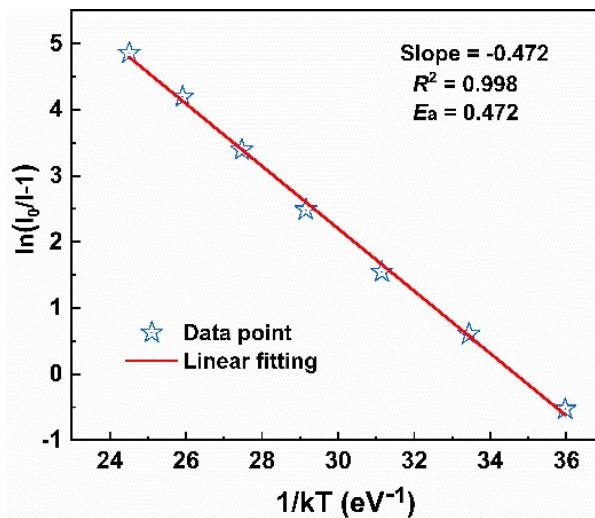

**Fig. S5** The relationship of  $\ln[(I_0/I_T)-1]$  with  $1/T$  in LKTGO: $x\text{Mn}^{4+}$  phosphor.

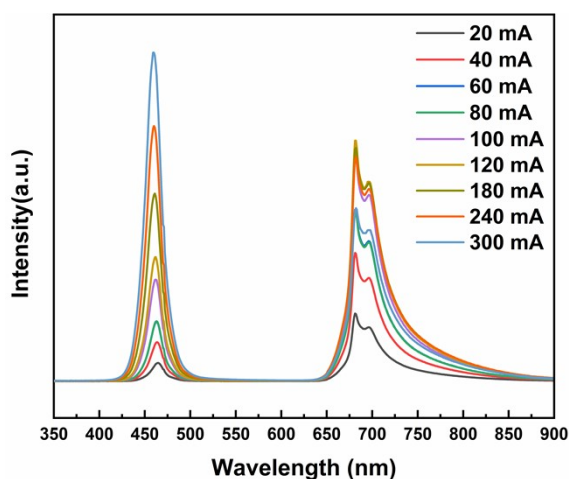

**Fig. S6** PL spectra of the prepared LED at various driving currents.

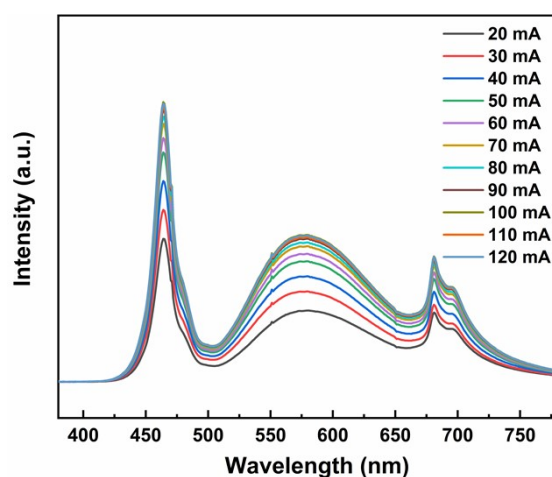

**Fig. S7** PL spectra of the prepared WLED at various driving currents.

## References

1. M. G. Brik and A. M. Srivastava, Electronic Energy Levels of the  $Mn^{4+}$  Ion in the Perovskite,  $CaZrO_3$ , *ECS J. Solid State Sci. Technol.*, 2013, **2**, R148-R152.
2. A. Fu, C. Zhou, Q. Chen, Z. Lu, T. Huang, H. Wang and L. Zhou, Preparation and optical properties of a novel double-perovskite phosphor,  $Ba_2GdNbO_6:Mn^{4+}$ , for light-emitting diodes, *Ceram. Int.*, 2017, **43**, 6353-6362.
3. T. Murata, T. Tanoue, M. Iwasaki, K. Morinaga and T. Hase, Fluorescence properties of  $Mn^{4+}$  in  $CaAl_{12}O_{19}$  compounds as red-emitting phosphor for white LED, *J. Lumin.*, 2005, **114**, 207-212.
4. S. J. Kim, H. S. Jang, S. Unithrattil, Y. H. Kim and W. B. Im, Structural and luminescent properties of red-emitting  $SrGe_4O_9:Mn^{4+}$  phosphors for white light-emitting diodes with high color

- rendering index, *J. Lumin.*, 2016, **172**, 99-104.
5. L. Shi, Y.-j. Han, Z.-x. Ji, Z.-h. Li, H.-h. Li, J.-y. Zhang and Z.-w. Zhang, Synthesis and photoluminescence properties of a novel  $\text{Ca}_2\text{LaNbO}_6:\text{Mn}^{4+}$  double perovskite phosphor for plant growth LEDs, *J. Mater. Sci. Mater. Electron.*, 2019, **30**, 15504-15511.
  6. W. Chen, Y. Cheng, L. Shen, C. Shen, X. Liang and W. Xiang, Red-emitting  $\text{Sr}_2\text{MgGe}_2\text{O}_7:\text{Mn}^{4+}$  phosphors: Structure, luminescence properties, and application in warm white light emitting diodes, *J. Alloys Compound.*, 2018, **762**, 688-696.
  7. Z. Zhou, J. Zheng, R. Shi, N. Zhang, J. Chen, R. Zhang, H. Suo, E. M. Goldys and C. Guo, Ab Initio Site Occupancy and Far-Red Emission of  $\text{Mn}^{4+}$  in Cubic-Phase  $\text{La}(\text{MgTi})_{1/2}\text{O}_3$  for Plant Cultivation, *ACS Appl. Mater. Interfaces*, 2017, **9**, 6177-6185.
  8. A. Fu, L. Zhou, S. Wang and Y. Li, Preparation, structural and optical characteristics of a deep red-emitting  $\text{Mg}_2\text{Al}_4\text{Si}_5\text{O}_{18}:\text{Mn}^{4+}$  phosphor for warm w-LEDs, *Dyes Pigments*, 2018, **148**, 9-15.
  9. F. Baur and T. Jüstel, Dependence of the optical properties of  $\text{Mn}^{4+}$  activated  $\text{A}_2\text{Ge}_4\text{O}_9$  (A=K,Rb) on temperature and chemical environment, *J. Lumin.*, 2016, **177**, 354-360.
  10. N. Ma, W. Li, B. Devakumar, Z. Zhang and X. Huang, Finding an efficient far-red-emitting  $\text{CaMg}_2\text{La}_2\text{W}_2\text{O}_{12}:\text{Mn}^{4+}$  phosphor toward indoor plant cultivation LED lighting, *Mater. Today Chem.*, 2021, **21**.
  11. Y. Wu, D. Lei and C. Wang, The formation of  $\text{LiAl}_5\text{O}_8$  nanowires from bulk Li-Al alloy enables dendrite-free Li metal batteries, *Mater. Today Phys.*, 2021, **18**.
  12. M. G. Brik, I. Sildos, M. Berkowski and A. Suchocki, Spectroscopic and crystal field studies of  $\text{YAlO}_3$  single crystals doped with Mn ions, *J. Phys. Condens. Matter*, 2009, **21**, 025404.
  13. M. G. Brik, A. M. Srivastava and N. M. Avram, Comparative analysis of crystal field effects and optical spectroscopy of six-coordinated  $\text{Mn}^{4+}$  ion in the  $\text{Y}_2\text{Ti}_2\text{O}_7$  and  $\text{Y}_2\text{Sn}_2\text{O}_7$  pyrochlores, *Opt. Mater.*, 2011, **33**, 1671-1676.
  14. L. Meng, L. Liang and Y. Wen, Deep red phosphors  $\text{SrMgAl}_{10}\text{O}_{17}:\text{Mn}^{4+}$ , M (M =  $\text{Li}^+$ ,  $\text{Na}^+$ ,  $\text{K}^+$ ,  $\text{Cl}^-$ ) for warm white light emitting diodes, *J. Mater. Sci. Mater. Electron.*, 2014, **25**, 2676-2681.
  15. A. S. Aleksandrovsky, I. A. Gudim, A. S. Krylov and V. L. Temerov, Luminescence of Yttrium Aluminum Borate Single Crystals Doped with Manganese, *Phys. Solid State*, 2007, **49**, 1695-1699.
